# Supplementary material for: One thousand somatic SNVs per skin fibroblast cell set baseline of mosaic mutational load with patterns that suggest proliferative origin
Source: HighWire-hosted journal article supplement (doi:10.1101/gr.215517.116), 2017-02-24
Supplement: Supplemental_Table_S5.xlsx [file Supplemental_Table_S5.xlsx]

## Sheet: VEP
INDIVIDUAL	CHROM	POSISTION	REF	ALT	GENE	EFFECT	STRENGTH	SOMATIC TAF
07-03	7	100385563	C	T	ZAN	missense_variant	MODERATE	N/A
	7	100385566	C	T	ZAN	missense_variant	MODERATE	N/A
	9	129456125	G	T	LMX1B	splice_donor_variant	HIGH	N/A
	13	23912440	G	T	SACS	missense_variant	MODERATE	N/A
	18	54339834	G	A	WDR7	missense_variant	MODERATE	N/A
03-04	1	32713188	C	T	FAM167B	missense_variant	MODERATE	N/A
	3	13525042	G	A	HDAC11	missense_variant	MODERATE	N/A
	3	74350867	T	A	CNTN3	missense_variant	MODERATE	N/A
	4	78669490	C	T	CNOT6L	missense_variant	MODERATE	N/A
	7	30101603	G	T	PLEKHA8	missense_variant	MODERATE	N/A
	9	21216741	C	A	IFNA16	missense_variant	MODERATE	N/A
	11	69972227	G	A	ANO1	missense_variant	MODERATE	0.0384
	12	404827	T	A	KDM5A	missense_variant	MODERATE	N/A
	21	43808546	C	G	TMPRSS3	missense_variant	MODERATE	N/A
03-03	1	28802671	G	T	PHACTR4	stop_gained	HIGH	N/A
	11	14156996	G	T	SPON1	stop_gained	HIGH	0.197
	14	32561316	G	T	ARHGAP5	stop_gained	HIGH	N/A
	14	32561340	G	A	ARHGAP5	missense_variant	MODERATE	N/A
	21	43412738	G	T	ZBTB21	missense_variant	MODERATE	N/A
S1123-03	2	196651885	T	C	DNAH7	missense_variant	MODERATE	N/A
	2	215440540	T	C	VWC2L	missense_variant	MODERATE	N/A
	7	92732283	T	C	SAMD9	missense_variant	MODERATE	0.0072
	11	45891282	G	A	CRY2	missense_variant	MODERATE	N/A
	11	55606850	A	T	OR5D16	missense_variant	MODERATE	N/A
	11	68305223	G	T	PPP6R3	stop_gained	HIGH	N/A
	11	117329470	C	T	DSCAML1	missense_variant,splice_region_variant	MODERATE	0.086
	12	64519801	C	T	SRGAP1	missense_variant	MODERATE	0.0087
	17	61903451	G	A	FTSJ3	missense_variant	MODERATE	N/A
	18	59768307	C	A	PIGN	splice_donor_variant	HIGH	0.0048
	19	9061096	C	G	MUC16	missense_variant	MODERATE	N/A
	19	36616392	G	A	TBCB	missense_variant	MODERATE	N/A
	22	46655529	A	T	PKDREJ	missense_variant	MODERATE	N/A

## Sheet: FunSeq
INDIVIDUAL	CHROM	POSISTION	REF	ALT	GENE	SCORE	SOMATIC TAF
07-03	6	106200938	G	T	PRDM1	2.09126	N/A
	8	23566643	G	T	NKX2-6	2.05459	N/A
	9	133984544	A	C	AIF1L	2.36843	N/A
	14	32545699	G	A	ARHGAP5	3.83022	N/A
03-04	1	58472816	C	G	DAB1	2.09516	N/A
	1	240276313	C	A	FMN2	2.09832	N/A
	2	175499448	G	T	WIPF1	2.23211	0.0181
	3	119182668	A	G	TMEM39A	2.08702	N/A
	6	43744730	G	A	VEGFA	2.38306	0.036
	6	99022943	A	C	POU3F2	2.2536	N/A
03-03	6	30693002	C	T	MDC1	2.33521	N/A
S1123-03	4	96956771	T	A	BMPR1B	2.08222	0.0625
	11	9852872	A	G	SBF2	2.5435	N/A
	11	12985800	C	A	.	2.40091	N/A
