# Supplementary material for: One thousand somatic SNVs per skin fibroblast cell set baseline of mosaic mutational load with patterns that suggest proliferative origin
Source: HighWire-hosted journal article supplement (doi:10.1101/gr.215517.116), 2017-02-24
Supplement: Supplemental_Table_S6.xlsx [file Supplemental_Table_S6.xlsx]

## Sheet: data
SNV	Capture	Amplicon	AF from ddPCR	Subject	Selection	Fwd Primer Sequence	Rev Primer Sequence	Probe Sequence
chr5:160336307, T>C	0.0302	0.03	0.0266	03-04	Targeted	TGGAAGGTAAGACACAGCCA	GAGAAACCAGTGTGCTATGTGA	AGAACACACACACACACAGCA
chr18:22640972, A>G	0.0271	0.029	0.0282			AACAGGTTAAGGCTCGAGAG	ACAAGAATCCTCACAGCACT	ACCAAGACTACCAGCACCACA
chr5:176266361, G>T	0.0267	0.032	0.0278			GATAAGTGGATTAGCTGGGAG	CATGTCCACTCTCCTCACTG	AGCTCTGTGGCATCAAGGTCCC
chr2:234244563, G>T	0.0245	0.029	0.0286			CTCCCCATGTGATATGCT	GAGAGTGTGAGCTACTGAGC	AGTCTCCAGACATTGGC
chr2:40177413, C>T	0.0233	0.032	0.0335			GCTACCAGACCAAAATAGAAGCT	TGTGAGCAAAATTGGAAGTCTTT	CCAAACATAACAGGGTTTTATCCATCT
chr11:78386317, T>C	0.0012	0.0027	0.0008			TTACCCTCTCTGGATCTCG	CAACACAGCTCAGACTCTC	TCAGTGAACTCTCTTTGCTGA
chr3:44770233, G>A	0.0018	0.0011	0.0017			GCTGGGATTTGAGACACAG	CTGCTTCCTCACTTACCAG	AATTCACACATATTAACCTCAC
chr18:6836418, G>A	0	0.001	0.0013			CAGGGAACAGGAAAGAGTG	CACATCTCAGTCACAGAGC	CTTGCTCTAAACCTACCAATTA
chr6:4785972, T>C	0.0028	N/A	0.0019	S1123-03	Random	GCAAAAAGATGCACCACC	GCCAGTCAAGTCCAAGTAC	TGGAGACTGCTGACATTTCC
chr4:176850524, G>C	0.0023	N/A	0.0014			TAGTTCATGCTCAACGCC	TAGACCTGTAACAACGGC	CCCTATAACTTGCAAAGTACAAAGT
chr9:103881356, C>G	0.002	N/A	0.0026			CTAAAATCAAGCCCCTGGG	ACTCTCAGAAAGCTCCTGG	CTGCATGTCCAATTTCGCTG
chr4:173292503, G>A	0.0031	N/A	0.0007			CTGGTCGGAACTTCCTATG	CATAGCCCGAAAGCACTG	AGGCCAATGACAACCTATAGC
chr2:39382871, A>G	N/A	N/A	0.0001	03-03		AACAGATTCTTGCTCTGTCA	AAGAATCGCTTGAACTTAGG	AGTGCAGTGGTGTGACCTTGG
chr3:11437689, G>A	0	N/A	0.0003			AGGTGATCCAAAACGTTAAA	GTAAAGATGGGGTTTCACTG	TGGAGGCTGAAGCAAGCGC
chr17:60090380, T>C	N/A	N/A	0.0009			CCACCACACCTAGCTAATTT	CAATAAGATATCTCAGGCTCT	AGTCTCGATCTCCTGACCTCGT
chr3:85271680, T>C	0	N/A	0.0002			TTTAAGATGCTTCCACACAA	TCCAAGTCCTCCAAAAAGTA	TCTGATAGTCTCCTTCCATTGGC
chr3:47837575, C>T	N/A	N/A	0.0008			CAGAAGAATCGCTTGAACT	ACCTCGGCCTTCTAAAGT	CTCAGTGGCCTCATGCCTGT
chr4:72999731, C>T	N/A	N/A	0.1319			CCCTGAGACTTTTAGGAAA	AAGTGATCTGTCTGCCTT	ATCCTAGCATTTTGGGAGGCC
chr7:107614314, G>A	N/A	N/A	0.2953			TTAGTAGAGATGGCGTTT	CATAAATAAAATAGGCTGGG	TGGCCAGGCTAGTCTTAAACT
chr10:94330569, A>T	N/A	N/A	0.1094			GACAAAACCCCATCTCTA	CTTCATCTCTTGGGTTCA	TCAGGTGGCTGAGGTGGG
chr19:46874059, G>A	N/A	N/A	0.4675			CATTATACAGCTCATGACTG	GTACTAGAGAGGCTGAAG	TGCAGTGGCAGGATCTCG
chr4:129432139, A>G	0.0676	N/A	0.3466			CATTGCACTCTATTTAGCC	CAGACATCCAAATAGCTAGA	AAGAGATTGTTTAATCAGCTCCCA
chr2:109542477, T>C	0	N/A	0			CCAAGAGGCTGTTATGAAAC	ATGAGAGACCCAGGTGTAAG	AGAAGCCACCGTTCTCTAGCAC
chr10:24138267, G>C	0	N/A	0			TTCTGGGAACCAGTTTTTAC	TTTTCACCAGAACTAGCAGA	TCCACATTTGGATCTAGCAGAGC
chr2:83643848, C>G	0	N/A	0			TGAACCATTTCAGCTACAG	ACCAGCAAAACTCTTATGTG	AGCCAAGGGCCTGCAATCC
chr7:26034784, C>G	0	N/A	0			CTCATGGAAGTGACATTCAG	ACGTTTTTCCTGAGCTTATT	ACTGTCACCACCAGCAAGAGC
chr2:6695877, T>C	0	N/A	0			AAATAATTTCTCGTCAACCA	TCAAATACTGCATGTTCTCA	CACACTACGTCCATGCATATACCT
